# Supplementary material for: Enhanced long wavelength omnidirectional photoresponses in photonic-structured perovskite photodetectors
Source: Royal Society of Chemistry journal article supplement (doi:10.1039/c9tc02149c), 2019-01-01
Supplement: c9tc02149c1.pdf [file c9tc02149c1.pdf]

## Supporting Information

### Enhanced Long Wavelength Omnidirectional Photoresponses in Photonic-structured Perovskite Photodetectors

Ning Li, Weixia Lan, Ying Suet Lau, Linfeng Cai, Ali Asgher Syed, and Furong Zhu\*

Department of Physics, Research Centre of Excellence for Organic Electronics, and Institute  
of Advanced Materials, Hong Kong Baptist University, Kowloon, Hong Kong, China

\*Corresponding Author: Email: [frzhu@hkbu.edu.hk](mailto:frzhu@hkbu.edu.hk)

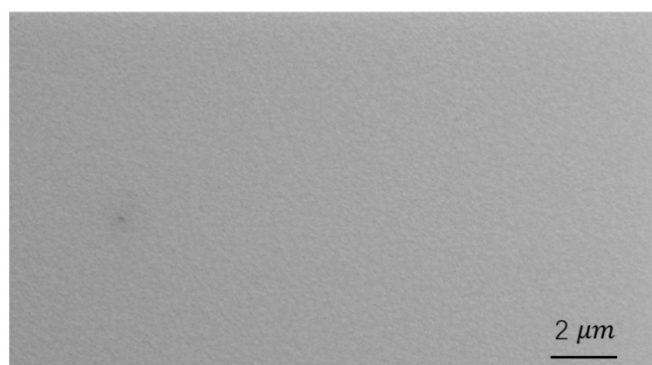

**Fig. S1.** The top view SEM image measured for the surface of the planar PEDOT:PSS HTL deposited on ITO/glass substrate.

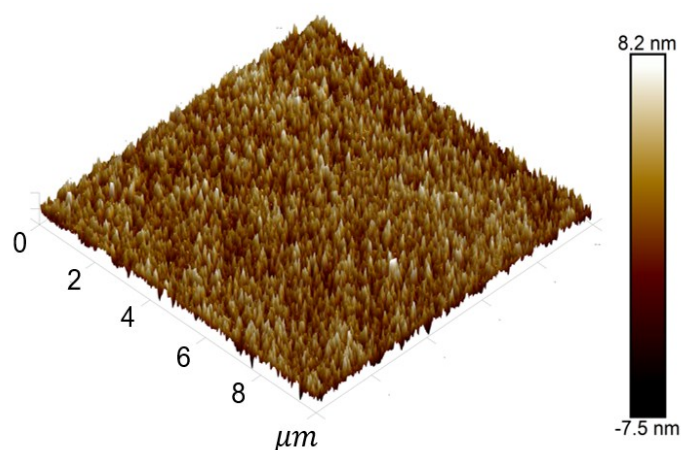

**Fig. S2.** The top view AFM image measured for the surface of the planar PEDOT:PSS HTL deposited on ITO/glass substrate.
